# Supplementary material for: The Questionable Quality Profile of Food Supplements: The Case of Red Yeast Rice Marketed Products
Source: MDPI journal article supplement (doi:10.3390/foods12112142), 2023-05-25
Supplement: s1 [file s1]

Supplementary materials to:

# The Questionable Quality Profile of Food Supplements: The Case of Red Yeast Rice Marketed Products

**Antonella Vitiello <sup>1,†</sup>, Luana Izzo <sup>2,†</sup>, Luigi Castaldo <sup>2</sup>, Ivana d'Angelo <sup>3</sup>, Francesca Ungaro <sup>1</sup>, Agnese Miro <sup>1,\*</sup>, Alberto Ritieni <sup>2</sup> and Fabiana Quaglia <sup>1</sup>**

<sup>1</sup> Drug delivery Laboratory, Department of Pharmacy, University of Naples Federico II, Via Domenico Montesano 49, 80131, Naples, Italy; antonella.vitiello3@unina.it (A.V.); francesca.ungaro@unina.it (F.U.); fabiana.quaglia@unina.it (F.Q.)

<sup>2</sup> FoodLab Laboratory, Department of Pharmacy, University of Naples Federico II, Via Domenico Montesano 49, 80131 Naples, Italy; luana.izzo@unina.it (L.I.); luigi.castaldo2@unina.it (L.C.); alberto.ritieni@unina.it (A.R.)

<sup>3</sup> Department of Environmental, Biological and Pharmaceutical Sciences and Technologies, University of Campania "Luigi Vanvitelli", Via Antonio Vivaldi 43, 81100 Caserta, Italy; ivana.d'angelo@unicampania.it (I.d.A)

\* Correspondence: agnese.miro@unina.it (A.M.); Tel.: +39 081678615

† These authors contributed equally to this work.

**Table S1.** Experimental condition and specification of mass uniformity assay prescribed by Ph. Eur. 11. Ed.

| Dosage Form                        | Average Mass                         | Percent deviation |
|------------------------------------|--------------------------------------|-------------------|
| Tablets (uncoated and film-coated) | Not more than 80 mg                  | 10                |
|                                    | More than 80 mg and less than 250 mg | 7.5               |
| Capsules                           | 250 mg or more                       | 5                 |
|                                    | Less than 300 mg                     | 10                |
|                                    | 300 mg or more                       | 7.5               |

**Table S2.** Experimental conditions and specification for pharmacopeial disintegration test.

| European Pharmacopoeia 11 |                                                                                                                          |                                                       |
|---------------------------|--------------------------------------------------------------------------------------------------------------------------|-------------------------------------------------------|
| Dosage form               | Immersion liquid/disc                                                                                                    | Maximum time of Disintegration                        |
| Uncoated tablets          | Purified water (35-39°C)<br>with disc                                                                                    | 15 min                                                |
| Coated tablets            | Purified water (35-39°C)<br>with disc <sup>a</sup>                                                                       | 30 min<br>(film-coated)<br>60 min<br>(other coatings) |
| Gastro-resistant tablets  | HCl 0.1 M (35-39°C) without disc<br>and then<br><br>Phosphate buffer solution pH 6.8 (35-39°C)<br>with disc <sup>b</sup> | Intact after not less than 1h<br><br>60 min           |
| Hard capsules             | Purified water or HCl 0.1 M <sup>c</sup>                                                                                 | 30 min                                                |
| Soft capsules             | Purified water or HCl 0.1 M with disc <sup>d</sup>                                                                       | 30 min                                                |

<sup>a</sup> If any of the tablets has not disintegrated, the test is repeat on a further 6 tablets, replacing water R with 0.1 M hydrochloric acid.

<sup>b</sup> If the tablets are not compliant to the test, due to disc adherence, the test should be repeated without discs.

<sup>c</sup> The use of discs is required if the capsules float in the immersion liquid.

<sup>d</sup> If the sof capsule adheres to the disc, it can be omitted.

**Table S3.** Stock solutions composition.

| Salt solution                                     | Stock concentration (mol/L) | SSF (pH 7)                              |                                             | SGF (pH 3)                              |                                     | SIF (pH 7)                              |                                     |
|---------------------------------------------------|-----------------------------|-----------------------------------------|---------------------------------------------|-----------------------------------------|-------------------------------------|-----------------------------------------|-------------------------------------|
|                                                   |                             | mL of Stock added to prepare 0.4 L (mL) | Final salt concentration in sample (mmol/L) | mL of Stock added to prepare 0.4 L (mL) | Final salt conc. in sample (mmol/L) | mL of Stock added to prepare 0.4 L (mL) | Final salt conc. in sample (mmol/L) |
| KCl                                               | 0.5                         | 15.1                                    | 15.1                                        | 6.9                                     | 6.9                                 | 6.8                                     | 6.8                                 |
| KH <sub>2</sub> PO <sub>4</sub>                   | 0.5                         | 3.7                                     | 1.35                                        | 0.9                                     | 0.9                                 | 0.8                                     | 0.8                                 |
| NaHCO <sub>3</sub>                                | 1                           | 6.8                                     | 13.68                                       | 12.5                                    | 25                                  | 42.5                                    | 85                                  |
| NaCl                                              | 2                           | -                                       | -                                           | 11.8                                    | 47.2                                | 9.6                                     | 38.4                                |
| MgCl <sub>2</sub> (H <sub>2</sub> O) <sub>6</sub> | 0.15                        | 0.5                                     | 0.15                                        | 0.4                                     | 0.12                                | 1.1                                     | 0.33                                |
| NH <sub>4</sub> (CO <sub>3</sub> ) <sub>2</sub>   | 0.5                         | 0.06                                    | 0.06                                        | 0.5                                     | 0.5                                 | -                                       | -                                   |
| CaCl <sub>2</sub> (H <sub>2</sub> O) <sub>2</sub> | 0.3                         | -                                       | 1.5                                         | -                                       | 0.15                                | -                                       | 0.6                                 |

Abbreviations: SSF: simulated salivary fluid, SGF: simulated gastric fluid, and SIF: simulated intestinal fluid.

**Table S4.** Information relevant for the study reported on the label of FS.

| Sample | Dosage form category | Single unit weight <sup>a</sup> (mg) | Number of AIs | AIs (Monacolin K) (mg)  | Inactive ingredients (mg) |
|--------|----------------------|--------------------------------------|---------------|-------------------------|---------------------------|
| #1     | Film-coated tablet   | 400                                  | 7             | 290 (-) <sup>d</sup>    | 110                       |
| #2     | Film-coated tablet   | 1000                                 | 2             | 539 (1.45) <sup>b</sup> | 471                       |
| #3     | Film-coated tablet   | 1100                                 | 3             | 615 (10) <sup>b</sup>   | 385                       |
| #4     | Film-coated tablet   | 1340                                 | 4             | 1004 (5) <sup>b</sup>   | 336                       |
| #5     | Film-coated tablet   | 983                                  | 6             | 780 (-) <sup>c</sup>    | 203                       |
| #6     | Uncoated tablet      | 1000                                 | 1             | 667 (-) <sup>d</sup>    | 333                       |
| #7     | Uncoated tablet      | 550                                  | 5             | 320 (10) <sup>b</sup>   | 230                       |
| #8     | Uncoated tablet      | Not reported                         | 8             | 739 (10) <sup>b</sup>   | -                         |
| #9     | Uncoated tablet      | 330                                  | 1             | 200 (10) <sup>b</sup>   | 130                       |
| #10    | Hard shell capsule   | 450                                  | 2             | 238.7 (10) <sup>b</sup> | 211                       |
| #11    | Hard shell capsule   | 500                                  | 2             | 280 (10) <sup>b</sup>   | 220                       |
| #12    | Hard shell capsule   | 450                                  | 6             | 213 (2.2) <sup>b</sup>  | 237                       |
| #13    | Softgels             | 1600                                 | 8             | 1063 (10) <sup>b</sup>  | 537                       |
| #14    | Softgels             | 1777                                 | 4             | 658 (5) <sup>b</sup>    | 1120                      |

<sup>a</sup> Calculated from the ratio between the total weight declared on the label and the number of dosage form units.

<sup>b</sup> Reported on the label as monacolin K.

<sup>c</sup> Reported on the label as monacolins.

<sup>d</sup> Not specified.

AI= Active ingredient.

Note. Following COMMISSION REGULATION (EU) 2022/860, the use of monacolins from red yeast rice is allowed at levels of less than 3 mg per portion of the product recommended for daily consumption.

**Table S5.** Inactive ingredients listed on the RYR FS label.

|                    |                                            | Film-coated tablets |    |                |                |    | Uncoated tablets |    |                 |                |
|--------------------|--------------------------------------------|---------------------|----|----------------|----------------|----|------------------|----|-----------------|----------------|
|                    |                                            | #1                  | #2 | #3             | #4             | #5 | #6               | #7 | #8 <sup>a</sup> | #9             |
| Tablet/tablet core | Microcrystalline cellulose                 | X                   | X  | X <sup>b</sup> | X <sup>b</sup> | X  | X <sup>b</sup>   | X  | -               | X <sup>b</sup> |
|                    | Starch                                     |                     |    |                |                |    | X                |    | -               |                |
|                    | Maltodextrines from Maize                  |                     | X  |                |                |    |                  |    | -               |                |
|                    | Calcium Carbonate                          |                     |    |                |                |    | X                |    | -               |                |
|                    | Cross-linked sodium carboxymethylcellulose |                     | X  | X              | X              | X  |                  |    | -               |                |
|                    | Silicon dioxide                            |                     | X  | X              | X              | X  | X                | X  | -               | X              |
|                    | Magnesium salts of fatty acids             | X <sup>c</sup>      | X  | X              | X              | X  | X                | X  | -               | X              |
|                    | Carminic Acid                              |                     |    |                | X              |    |                  |    | -               |                |
|                    | Titanium dioxide (E. 171) <sup>d</sup>     |                     | X  | X              |                |    |                  |    | -               |                |
|                    | Iron oxide red                             |                     |    | X              |                |    |                  |    | -               |                |
|                    | Iron oxide black                           |                     |    |                |                |    |                  |    | -               |                |
|                    | Iron oxides and iron hydroxides            |                     | X  |                | X              |    |                  |    | -               |                |
|                    | Hydroxypropyl methyl cellulose             | X                   | X  | X              |                |    |                  |    | -               |                |
|                    | Hydroxypropylcellulose                     |                     |    |                |                | X  |                  |    | -               |                |
| Coating            | Polyvinyl alcohol                          |                     |    | X              |                |    |                  |    | -               |                |
|                    | Polyvinylpyrrolidone                       |                     |    |                |                | X  |                  |    | -               |                |
|                    | Microcrystalline cellulose                 | X                   | X  | X              | X              | X  |                  |    |                 |                |
|                    | Talc                                       |                     | X  |                | X              | X  |                  |    | -               |                |
|                    | Polyethylene glycol                        |                     | X  |                | X              |    |                  |    | -               |                |
|                    | Glycerol                                   |                     |    | X              |                |    |                  |    | -               |                |
|                    | Stearic acid                               | X                   |    |                |                |    |                  |    | -               |                |
|                    | Polysorbate 80                             |                     |    |                | X              |    |                  |    | -               |                |
|                    | Niacin (nicotinamide/vitamin B3)           |                     |    |                | X              |    |                  |    | -               |                |
|                    | Shellac                                    |                     |    |                |                | X  |                  |    | -               |                |

<sup>a</sup> The label does not report the ingredient list.<sup>b</sup> Reported as “cellulose” in the ingredient list.<sup>c</sup> Reported as “vegetable magnesium stearate” in the ingredient list.<sup>d</sup> Banned in food since 7<sup>th</sup> August 2022.

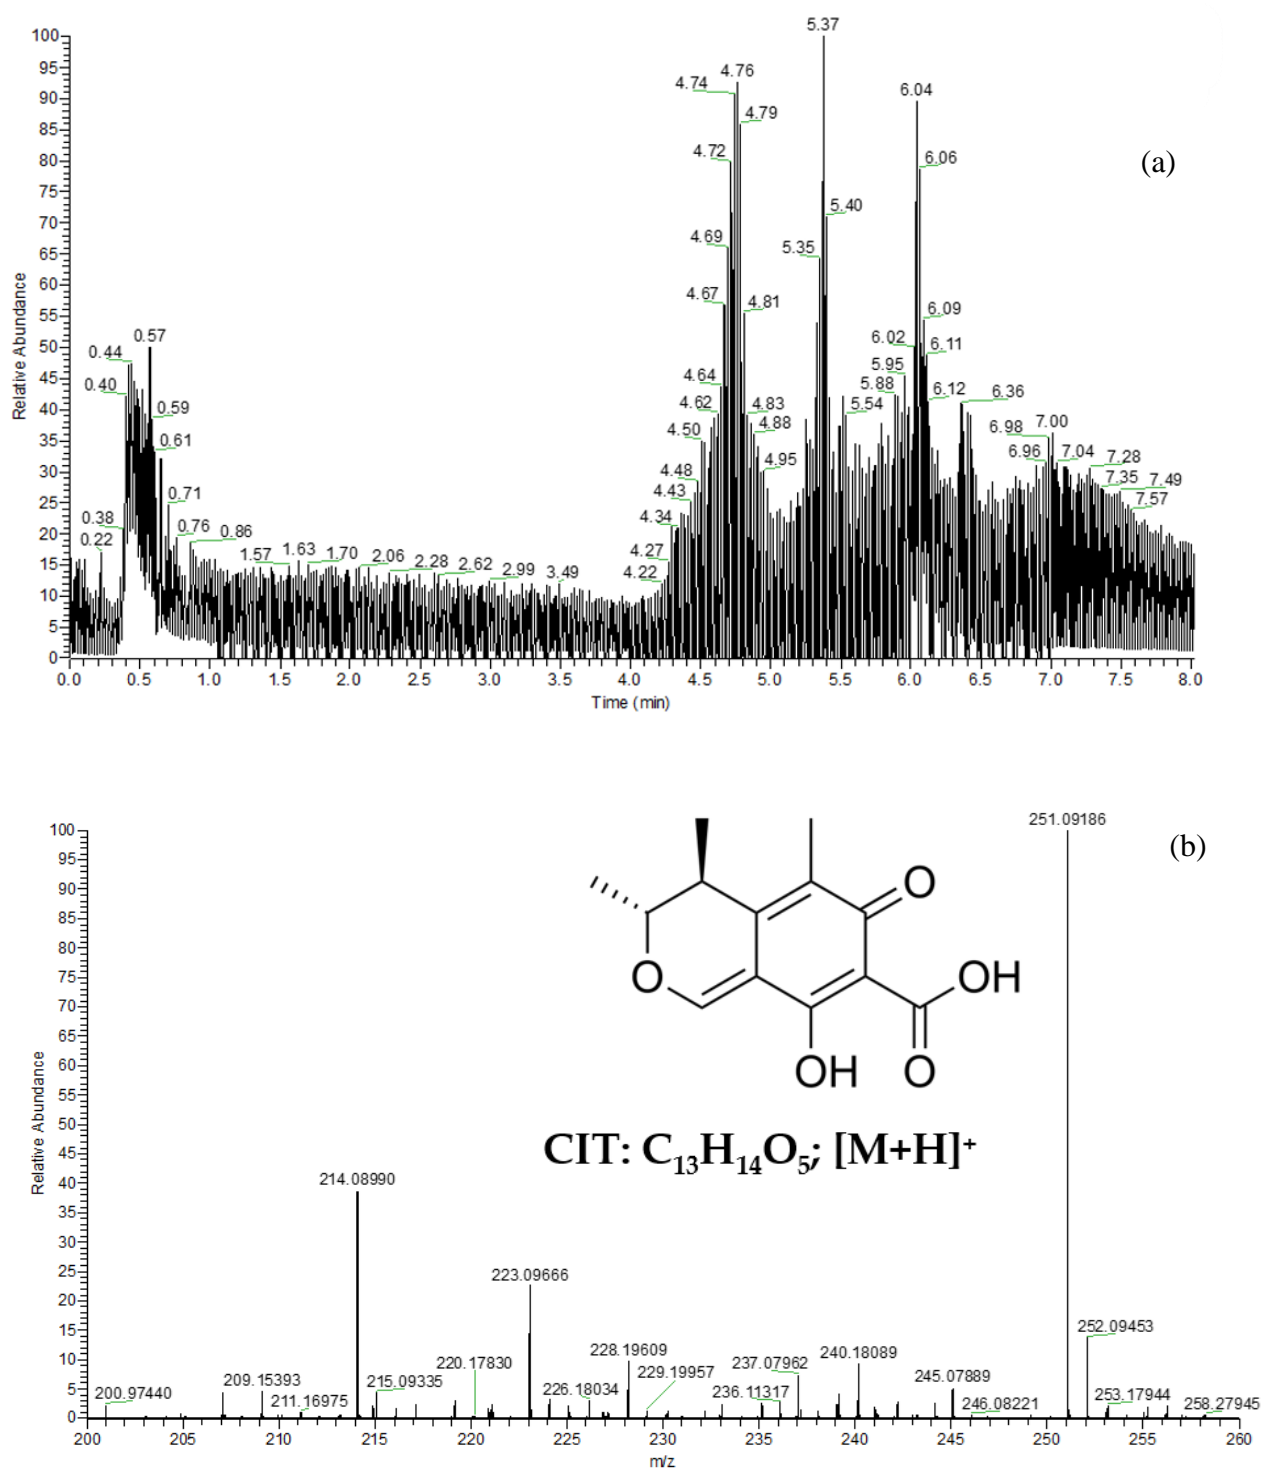

Figure S1. Extracted ion chromatogram (a) and mass spectra (b) of citrinin
